# Supplementary material for: Perioperative and oncological outcomes of uniportal versus three-port thoracoscopic segmentectomy for lung cancer: a propensity score matching analysis
Source: PubMed Central journal article supplement — Transl Lung Cancer Res. 2023 Mar 7;12(3):446–59. doi: 10.21037/tlcr-22-635 (PMC10088001; doi:10.21037/tlcr-22-635), 2023-03-07
Supplement: tlcr-12-03-446-supplementary.pdf [file tlcr-12-03-446-supplementary.pdf]

**Table S1** Baseline characteristics between uniportal and three-port group in patients with simple, complex and combined segmentectomies

| Characteristics                  | Simple                 |                        |       | Complex                |                        |      | Combined               |                        |       |
|----------------------------------|------------------------|------------------------|-------|------------------------|------------------------|------|------------------------|------------------------|-------|
|                                  | Uniportal [123]        | Three-port [370]       | P     | Uniportal [181]        | Three-port [566]       | P    | Uniportal [96]         | Three-port [264]       | P     |
| Age at surgery (years)           |                        |                        | 0.67  |                        |                        | 0.56 |                        |                        | 0.87  |
| Mean ± SD                        | 53.90 (11.23)          | 54.41 (11.54)          |       | 50.67 (11.79)          | 51.24 (11.29)          |      | 53.71 (10.92)          | 53.48 (11.14)          |       |
| Median [IQR]                     | 54.00 [47.50, 61.50]   | 54.00 [46.00, 63.00]   |       | 51.00 [42.00, 58.00]   | 51.00 [43.00, 58.00]   |      | 53.00 [46.75, 61.25]   | 54.00 [46.00, 62.00]   |       |
| Sex                              |                        |                        | 0.75  |                        |                        | 0.46 |                        |                        | 0.11  |
| Female                           | 88 (71.54)             | 257 (69.46)            |       | 123 (67.96)            | 403 (71.20)            |      | 79 (82.29)             | 194 (73.48)            |       |
| Male                             | 35 (28.46)             | 113 (30.54)            |       | 58 (32.04)             | 163 (28.80)            |      | 17 (17.71)             | 70 (26.52)             |       |
| FEV1%                            |                        |                        | 0.67  |                        |                        | 0.75 |                        |                        | 0.65  |
| Mean ± SD                        | 106.49 (16.85)         | 107.30 (17.12)         |       | 106.80 (12.59)         | 107.23 (15.23)         |      | 109.28 (15.87)         | 108.38 (15.93)         |       |
| Median [IQR]                     | 106.10 [97.80, 117.00] | 106.40 [97.25, 117.70] |       | 106.40 [98.10, 115.00] | 106.60 [97.90, 116.60] |      | 107.95 [99.10, 117.55] | 108.30 [98.55, 116.90] |       |
| DLCO%                            |                        |                        | 0.035 |                        |                        | 0.64 |                        |                        | 0.13  |
| Mean ± SD                        | 98.67 (13.82)          | 102.21 (15.57)         |       | 102.53 (16.00)         | 101.86 (15.57)         |      | 104.37 (13.33)         | 101.59 (14.81)         |       |
| Median [IQR]                     | 98.15 [88.30, 107.53]  | 101.60 [91.20, 110.47] |       | 100.95 [92.25, 112.78] | 100.15 [91.27, 110.53] |      | 101.40 [95.65, 112.90] | 100.65 [91.10, 111.10] |       |
| Tumor size (cm)                  |                        |                        | 0.38  |                        |                        | 0.65 |                        |                        | 0.72  |
| Mean ± SD                        | 1.15 (0.55)            | 1.20 (0.58)            |       | 1.10 (0.42)            | 1.08 (0.46)            |      | 1.16 (0.52)            | 1.14 (0.46)            |       |
| Median [IQR]                     | 1.00 [0.80, 1.30]      | 1.00 [0.80, 1.50]      | 0.61  | 1.00 [0.80, 1.40]      | 1.00 [0.80, 1.30]      | 0.32 | 1.00 [0.80, 1.40]      | 1.00 [0.80, 1.40]      | 0.92  |
| Clinical stage                   |                        |                        | >0.99 |                        |                        | 0.46 |                        |                        | 0.60  |
| IA                               | 122 (99.19)            | 367 (99.19)            |       | 181 (100.00)           | 561 (99.12)            |      | 95 (98.96)             | 264 (100.00)           |       |
| IB                               | 1 (0.81)               | 3 (0.81)               |       | 0 (0.00)               | 5 (0.88)               |      | 1 (1.04)               | 0 (0.00)               |       |
| Development of pulmonary fissure |                        |                        | 0.37  |                        |                        | 0.68 |                        |                        | 0.093 |
| Well                             | 67 (54.92)             | 217 (60.11)            |       | 110 (61.11)            | 354 (63.21)            |      | 69 (71.88)             | 160 (61.54)            |       |
| Incomplete                       | 55 (45.08)             | 144 (39.89)            |       | 70 (38.89)             | 206 (36.79)            |      | 27 (28.12)             | 100 (38.46)            |       |
| Missing                          | 1 (0.81)               | 9 (2.55)               |       | 1 (0.58)               | 6 (1.06)               |      | 0 (0.00)               | 4 (1.52)               |       |
| Pleural adhesions                |                        |                        | 0.064 |                        |                        | 0.38 |                        |                        | 0.29  |
| No                               | 44 (35.77)             | 98 (26.49)             |       | 63 (35.20)             | 175 (31.31)            |      | 26 (27.08)             | 89 (33.71)             |       |
| Yes                              | 79 (64.23)             | 272 (73.51)            |       | 116 (64.80)            | 384 (68.69)            |      | 70 (72.92)             | 175 (66.29)            |       |
| Missing                          | 0 (0.00)               | 0 (0.00)               |       | 2 (1.10)               | 7 (1.23)               |      | 0 (0.00)               | 0 (0.00)               |       |
| Histology                        |                        |                        | 0.80  |                        |                        | 0.21 |                        |                        | 0.32  |
| AAH                              | 0 (0.00)               | 4 (1.13)               |       | 1 (0.58)               | 9 (1.64)               |      | 0 (0.00)               | 5 (3.40)               |       |
| AIS                              | 4 (3.42)               | 10 (2.83)              |       | 8 (4.68)               | 19 (3.46)              |      | 3 (4.76)               | 5 (3.40)               |       |
| MIA                              | 57 (48.72)             | 155 (43.91)            |       | 81 (47.37)             | 308 (56.10)            |      | 36 (57.14)             | 72 (48.98)             |       |
| Invasive adenocarcinoma          | 52 (44.44)             | 170 (48.16)            |       | 75 (43.86)             | 200 (36.43)            |      | 21 (33.33)             | 59 (40.14)             |       |
| Others*                          | 1 (0.81)               | 5 (1.42)               |       | 0 (0.00)               | 0 (0.00)               |      | 1 (1.59)               | 0 (0.00)               |       |
| Missing                          | 3 (2.56)               | 9 (2.55)               |       | 6 (3.51)               | 13 (2.37)              |      | 2 (3.17)               | 6 (4.08)               |       |
| Surgeon volume                   |                        |                        | 0.34  |                        |                        | 0.67 |                        |                        | 0.022 |
| Low                              | 76 (61.79)             | 248 (67.03)            |       | 111 (61.33)            | 359 (63.43)            |      | 76 (79.17)             | 174 (65.91)            |       |
| High                             | 47 (38.21)             | 122 (32.97)            |       | 70 (38.67)             | 207 (36.57)            |      | 20 (20.83)             | 90 (34.09)             |       |
| Year of surgery                  |                        |                        | 0.93  |                        |                        | 0.53 |                        |                        | 0.033 |
| 2014–2017                        | 19 (15.45)             | 54 (14.59)             |       | 27 (14.92)             | 72 (12.72)             |      | 2 (2.08)               | 25 (9.47)              |       |
| 2018–2021                        | 104 (84.55)            | 316 (85.41)            |       | 154 (85.08)            | 494 (87.28)            |      | 94 (97.92)             | 239 (90.53)            |       |

Data were presented as mean (SD), median [IQR] or number (percentage). IQR, interquartile range; FEV1%, predicted forced expiratory volume in 1 second; DLCO%, predicted carbon monoxide diffusing capacity; LUL, left upper lobe; LLL, left lower lobe; RUL, right upper lobe; RML, right middle lobe; RLL, right lower lobe; AAH, atypical adenomatous hyperplasia; AIS, adenocarcinoma in situ; IA, invasive adenocarcinoma; MIA, minimally invasive adenocarcinoma. \*Others including large cell carcinoma, undifferentiated cancers, neuroendocrine tumor, salivary gland tumor and adenosquamous carcinoma.

**Table S2** Perioperative outcomes between uniportal and three-port group in patients with simple, complex and combined segmentectomies

|                                       | Simple                  |                         |        | Complex                 |                         |        | Combined                |                         |        |
|---------------------------------------|-------------------------|-------------------------|--------|-------------------------|-------------------------|--------|-------------------------|-------------------------|--------|
|                                       | Uniportal [123]         | Three-port [370]        | P      | Uniportal [181]         | Three-port [566]        | P      | Uniportal [96]          | Three-port [264]        | P      |
| Convert to thoracotomy                | 0 (0.00)                | 2 (0.54)                | >0.99  | 0 (0.00)                | 2 (0.36)                | >0.99  | 0 (0.00)                | 2 (0.76)                | 0.96   |
| Number of LNs harvested               |                         |                         | 0.018  |                         |                         | 0.91   |                         |                         | 0.59   |
| Mean (SD)                             | 6.17 (3.03)             | 7.01 (3.48)             |        | 6.35 (2.79)             | 6.38 (3.37)             |        | 6.71 (3.22)             | 6.95 (3.87)             |        |
| Median [IQR]                          | 5.00 [4.00, 8.00]       | 6.00 [5.00, 9.00]       |        | 6.00 [5.00, 8.00]       | 6.00 [4.00, 8.00]       |        | 6.00 [4.00, 9.00]       | 6.00 [4.75, 9.00]       |        |
| Number of LN stations harvested       |                         |                         | 0.007  |                         |                         | 0.24   |                         |                         | 0.66   |
| Mean (SD)                             | 4.20 (1.39)             | 4.67 (1.72)             |        | 4.42 (1.51)             | 4.61 (2.03)             |        | 4.74 (1.68)             | 4.85 (2.17)             |        |
| Median [IQR]                          | 4.00 [3.00, 5.00]       | 5.00 [3.00, 6.00]       |        | 4.00 [3.00, 5.00]       | 4.00 [3.00, 6.00]       |        | 4.00 [4.00, 6.00]       | 5.00 [3.75, 6.00]       |        |
| Intraoperative blood loss (mL)        |                         |                         | <0.001 |                         |                         | <0.001 |                         |                         | <0.001 |
| Mean (SD)                             | 33.01 (12.45)           | 44.02 (8.46)            |        | 31.85 (12.39)           | 44.22 (8.59)            |        | 26.73 (8.84)            | 42.52 (8.31)            |        |
| Median [IQR]                          | 26.16 [23.38, 48.75]    | 41.48 [34.86, 56.14]    |        | 23.38 [23.38, 48.75]    | 41.48 [34.86, 56.14]    |        | 23.38 [23.38, 23.38]    | 41.48 [34.86, 53.32]    |        |
| Operative time (min)                  |                         |                         | 0.62   |                         |                         | <0.001 |                         |                         | 0.75   |
| Mean (SD)                             | 99.85 (33.17)           | 97.91 (38.83)           |        | 109.25 (32.62)          | 93.32 (33.54)           |        | 111.78 (28.73)          | 110.25 (43.36)          |        |
| Median [IQR]                          | 93.00 [75.00, 120.00]   | 90.00 [70.00, 116.50]   |        | 105.00 [86.50, 125.00]  | 90.00 [69.00, 110.00]   |        | 114.00 [93.50, 132.00]  | 102.50 [75.75, 135.00]  |        |
| Postoperative hospital stay (days)    |                         |                         | 0.57   |                         |                         | 0.003  |                         |                         | 0.095  |
| Mean (SD)                             | 4.23 (1.92)             | 4.38 (2.74)             |        | 4.39 (2.24)             | 3.90 (1.84)             |        | 4.02 (1.73)             | 4.47 (2.40)             |        |
| Median [IQR]                          | 4.00 [3.00, 5.00]       | 4.00 [3.00, 5.00]       |        | 4.00 [3.00, 5.00]       | 3.00 [3.00, 4.00]       |        | 3.00 [3.00, 4.25]       | 4.00 [3.00, 5.00]       |        |
| Hospitalization cost (kUSD)           |                         |                         | 0.92   |                         |                         | <0.001 |                         |                         | 0.10   |
| Mean (SD)                             | 7.20 (1.30)             | 7.18 (7.18)             |        | 7.28 (1.18)             | 6.82 (1.15)             |        | 8.56 (1.65)             | 8.27 (1.68)             |        |
| Median [IQR]                          | 7.06 [6.36, 7.64]       | 7.00 [6.21, 7.89]       |        | 7.15 [6.63, 7.64]       | 6.77 [6.12, 7.52]       |        | 8.38 [7.54, 9.52]       | 8.05 [7.23, 9.14]       |        |
| Chest tube drainage (mL)              |                         |                         |        |                         |                         |        |                         |                         |        |
| Within the first 3 postoperative days |                         |                         | 0.79   |                         |                         | 0.40   |                         |                         | 0.89   |
| Mean (SD)                             | 362.51 (213.43)         | 354.79 (295.40)         |        | 310.92 (211.21)         | 294.01 (238.95)         |        | 418.51 (247.65)         | 422.76 (268.74)         |        |
| Median [IQR]                          | 330.00 [215.00, 455.00] | 300.00 [180.00, 478.75] |        | 270.00 [140.00, 420.00] | 250.00 [112.50, 400.00] |        | 390.00 [220.00, 565.00] | 360.00 [240.00, 600.00] |        |
| Total drainage                        |                         |                         | 0.81   |                         |                         | 0.33   |                         |                         | 0.15   |
| Mean (SD)                             | 426.59 (399.47)         | 439.74 (541.82)         |        | 384.81 (388.68)         | 350.94 (405.17)         |        | 449.87 (296.19)         | 603.90 (1011.08)        |        |
| Median [IQR]                          | 340.00 [210.00, 503.00] | 305.00 [180.00, 521.50] |        | 280.00 [157.50, 455.00] | 250.00 [115.00, 420.00] |        | 400.00 [220.00, 590.00] | 380.00 [240.00, 660.00] |        |
| Postoperative complications           | 6 (4.88)                | 18 (4.86)               | >0.99  | 8 (4.42)                | 20 (3.53)               | 0.75   | 3 (3.12)                | 18 (6.82)               | 0.29   |
| Pulmonary infection                   | 1 (0.81)                | 4 (1.08)                | >0.99  | 3 (1.66)                | 4 (0.71)                | 0.48   | 2 (2.08)                | 4 (1.52)                | >0.99  |
| Persistent air leakage                | 4 (3.25)                | 7 (1.89)                | 0.59   | 4 (2.21)                | 5 (0.88)                | 0.30   | 0 (0.00)                | 7 (2.65)                | 0.24   |
| Chylothorax                           | 0 (0.00)                | 2 (0.54)                | >0.99  | 1 (0.55)                | 3 (0.53)                | >0.99  | 0 (0.00)                | 3 (1.14)                | 0.69   |
| Others                                | 2 (1.63)                | 7 (1.89)                | >0.99  | 2 (1.10)                | 6 (1.06)                | >0.99  | 1 (1.04)                | 6 (2.27)                | 0.75   |

Data were presented as mean (SD), median [IQR] or number (percentage).

**Table S3** Perioperative outcomes among three types of segmentectomies

| Outcomes                              | Simple (493)            | Complex (747)           | Combined (360)          | P value |
|---------------------------------------|-------------------------|-------------------------|-------------------------|---------|
| Convert to thoracotomy                | 2 (0.41)                | 2 (0.27)                | 2 (0.56)                | 0.76    |
| Number of LNs harvested               |                         |                         |                         |         |
| Mean (SD)                             | 6.80 (3.39)             | 6.37 (3.24)             | 6.88 (3.70)             | 0.024   |
| Median [IQR]                          | 6.00 [4.00, 9.00]       | 6.00 [4.00, 9.00]       | 6.00 [4.00, 8.00]       | 0.019   |
| Number of LN stations harvested       |                         |                         |                         |         |
| Mean (SD)                             | 4.55 (1.65)             | 4.57 (1.92)             | 4.82 (2.05)             | 0.071   |
| Median [IQR]                          | 4.00 [3.00, 6.00]       | 5.00 [4.00, 6.00]       | 4.00 [3.00, 6.00]       | 0.021   |
| Intraoperative blood loss (mL)        |                         |                         |                         |         |
| Mean (SD)                             | 41.28 (10.72)           | 41.22 (11.00)           | 38.31 (10.96)           | <0.001  |
| Median [IQR]                          | 41.28 (10.72)           | 38.31 (10.96)           | 41.22 (11.00)           | <0.001  |
| Operative time (min)                  |                         |                         |                         |         |
| Mean (SD)                             | 98.39 (37.47)           | 97.18 (33.99)           | 110.65 (39.98)          | <0.001  |
| Median [IQR]                          | 90.00 [70.00, 117.00]   | 105.00 [80.00, 135.00]  | 92.00 [70.50, 119.00]   | <0.001  |
| Postoperative hospital stay (days)    |                         |                         |                         |         |
| Mean (SD)                             | 4.34 (2.56)             | 4.02 (1.96)             | 4.35 (2.25)             | 0.016   |
| Median [IQR]                          | 4.00 [3.00, 5.00]       | 4.00 [3.00, 5.00]       | 3.00 [3.00, 4.00]       | 0.001   |
| Hospitalization cost (kUSD)           |                         |                         |                         |         |
| Mean (SD)                             | 7.18 (1.48)             | 6.93 (1.17)             | 8.35 (1.67)             |         |
| Median [IQR]                          | 7.04 [6.29, 7.82]       | 8.15 [7.32, 9.29]       | 6.85 [6.24, 7.55]       | <0.001  |
| Chest tube drainage (mL)              |                         |                         |                         | <0.001  |
| Within the first 3 postoperative days |                         |                         |                         |         |
| Mean (SD)                             | 356.71 (277.12)         | 298.12 (232.48)         | 421.63 (262.96)         | <0.001  |
| Median [IQR]                          | 305.00 [190.00, 470.00] | 360.00 [240.00, 600.00] | 250.00 [120.00, 410.00] | <0.001  |
| Total drainage                        |                         |                         |                         |         |
| Mean (SD)                             | 436.47 (509.82)         | 359.18 (401.23)         | 562.79 (881.25)         | <0.001  |
| Median [IQR]                          | 315.00 [190.00, 512.50] | 380.00 [240.00, 650.00] | 260.00 [130.00, 430.00] | <0.001  |
| Postoperative complications           | 24 (4.87)               | 28 (3.75)               | 21 (5.83)               | 0.28    |
| Pulmonary infection                   | 5 (1.01)                | 7 (0.94)                | 6 (1.67)                | 0.54    |
| Persistent air leakage                | 11 (2.23)               | 9 (1.20)                | 7 (1.94)                | 0.36    |
| Chylothorax                           | 2 (0.41)                | 4 (0.54)                | 3 (0.83)                | 0.71    |
| Others                                | 9 (1.83)                | 8 (1.07)                | 7 (1.94)                | 0.41    |

Data were presented as mean ± SD or number (percentage %). LNs, lymph nodes.

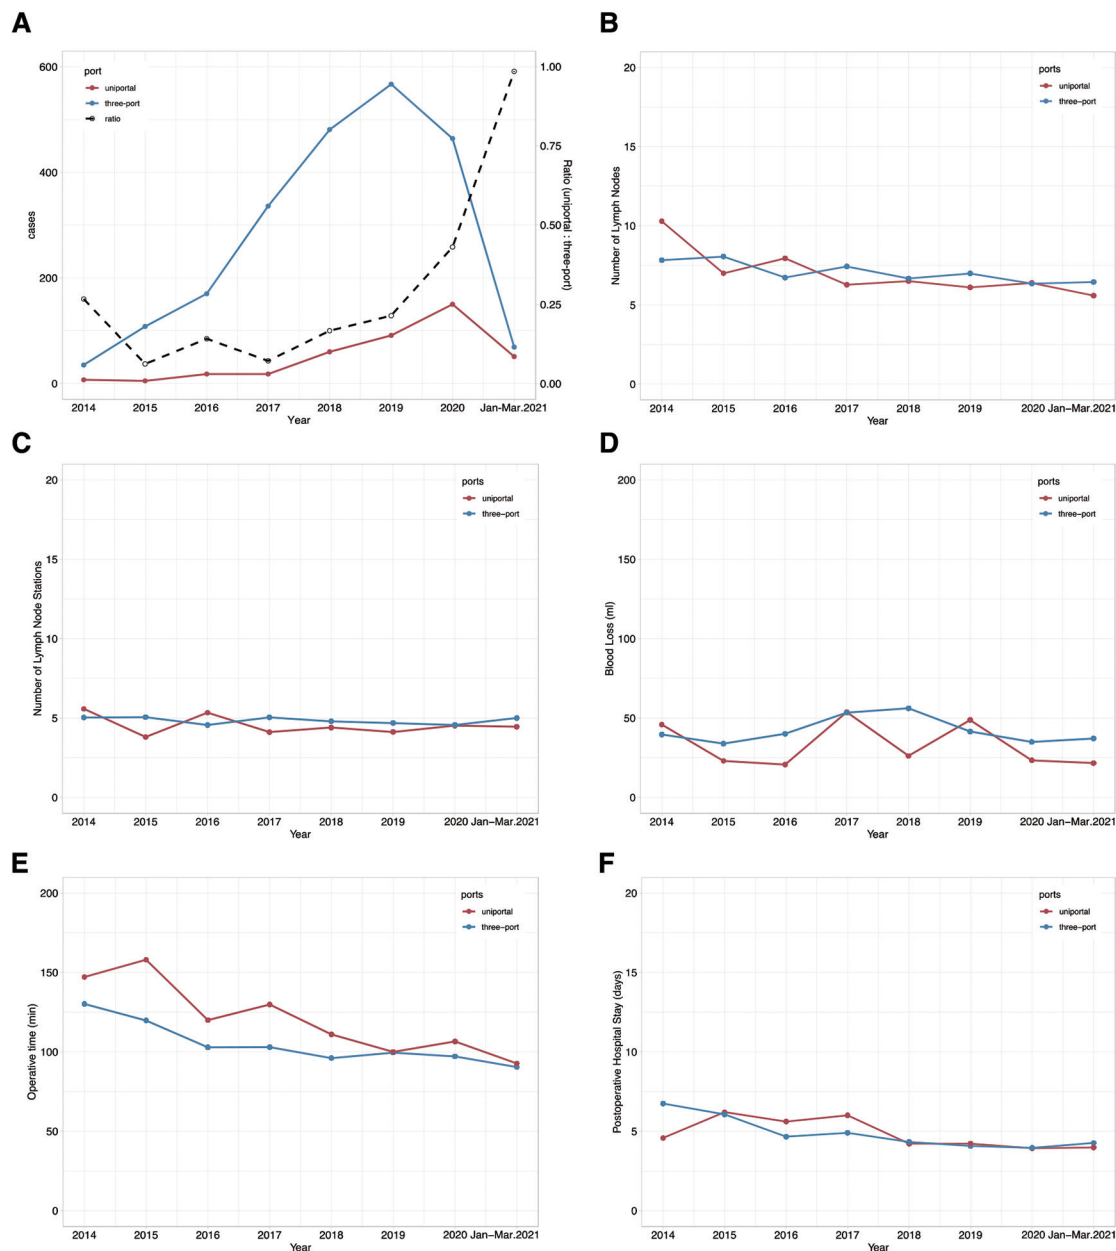

**Figure S1** Trend in operation related variables by year. Red solid line indicated uniportal thoroscopic segmentectomy, blue solid line indicated three-port segmentectomy. Black dotted line represented proportion of uniportal thoroscopic segmentectomies to thoroscopic segmentectomies. (A) Number of cases, ratio of uniportal cases to overall cases. (B) Mean number of lymph nodes dissected. (C) Mean number of lymph node stations dissected. (D) mean intraoperative blood loss. (E) mean operative time. (F) mean postoperative hospital stay.

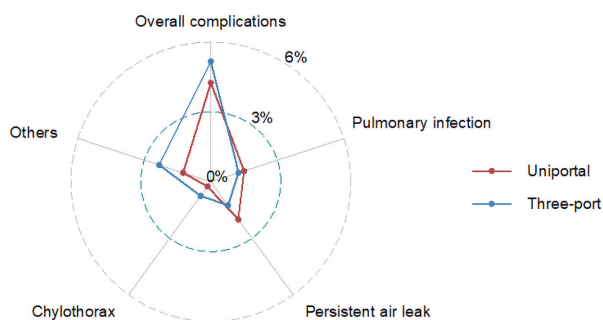

**Figure S2** Incidence of complications in uniportal and three-port groups. Red solid line represented uniportal thoroscopic segmentectomy, blue solid line represented three-port segmentectomy. Overall incidence of complications, incidence of pulmonary infection, persistent air leakage, chylothorax, and other complications had no significant difference between the two groups.

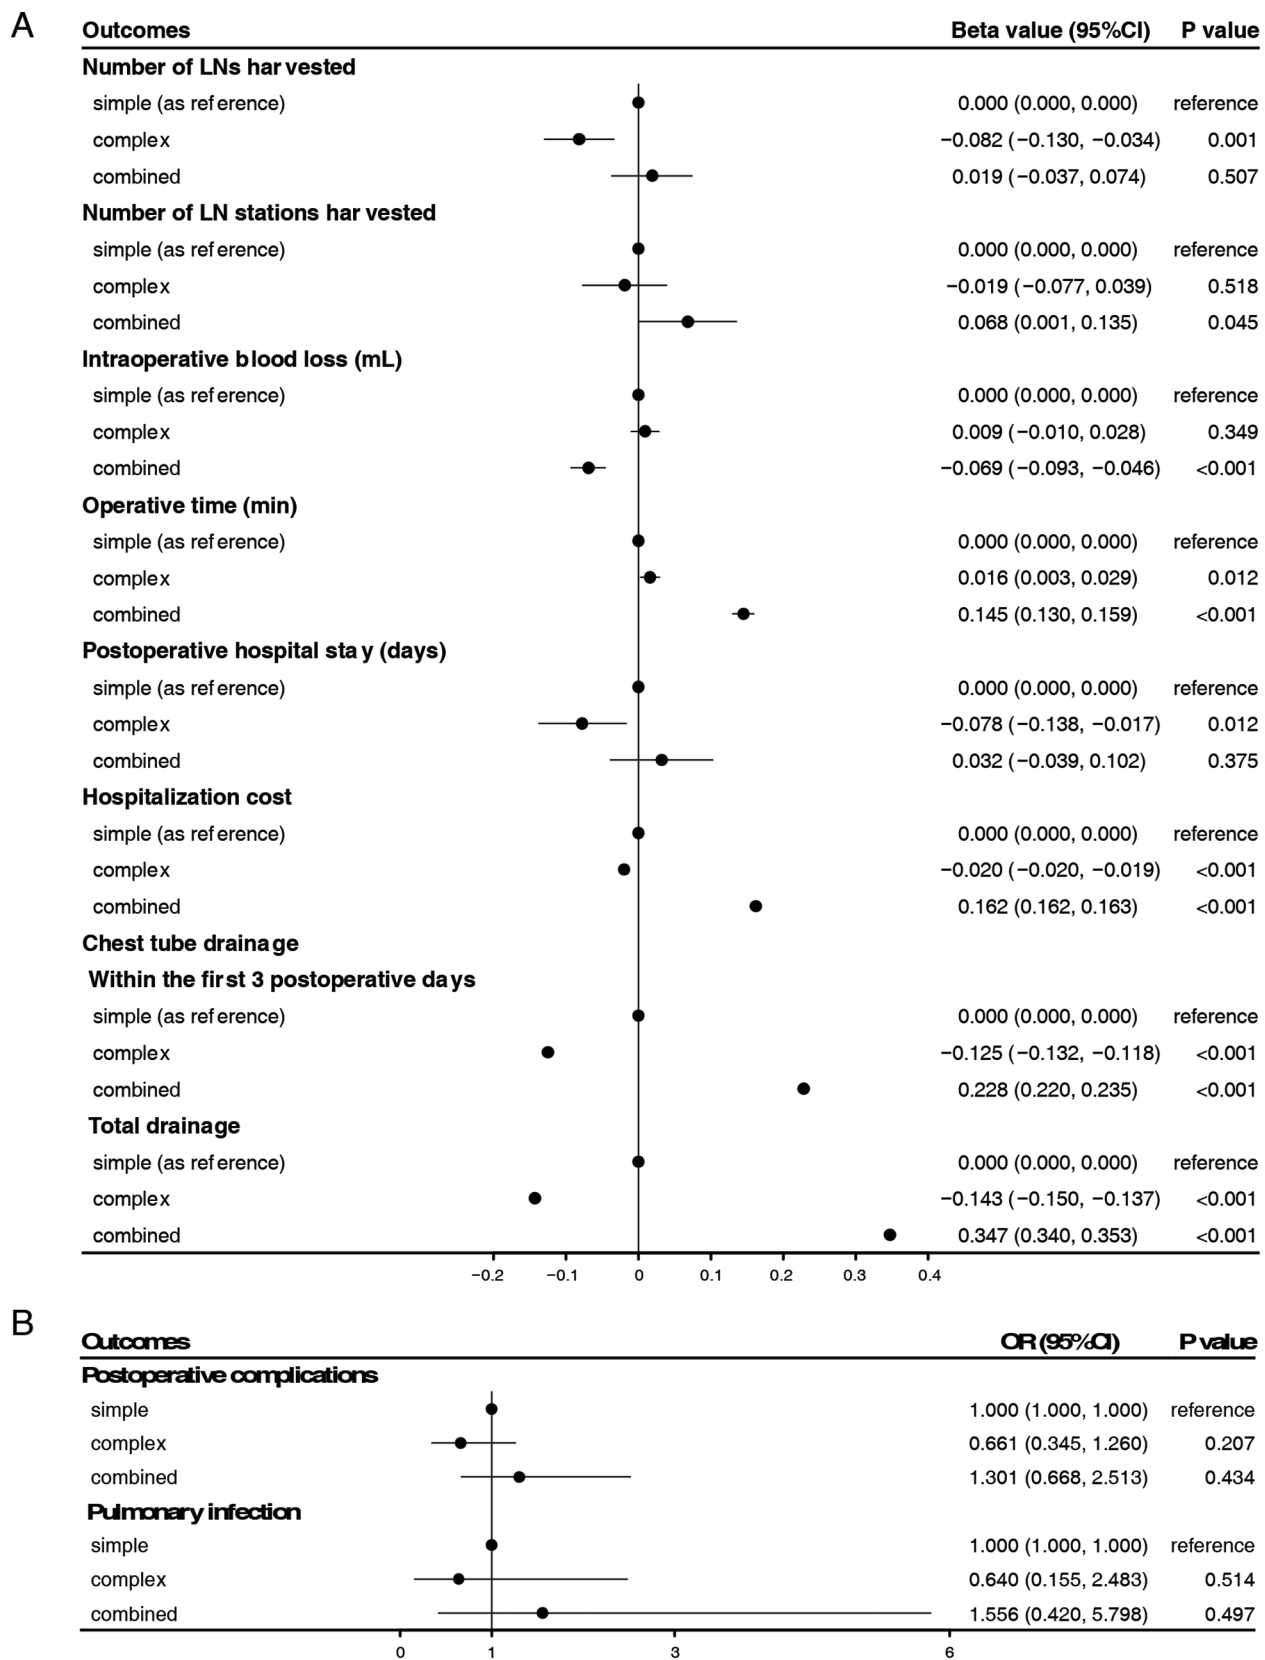

**Figure S3** Forest plot showing the association between segmentectomy subtypes and perioperative outcomes, adjusting age, sex, percentage of predicted forced expiratory volume in one second, predicted carbon monoxide diffusing capacity, tumor size, pleural adhesion, development of intralobular fissures, surgeons, and surgery date (year). LNs, lymph nodes.

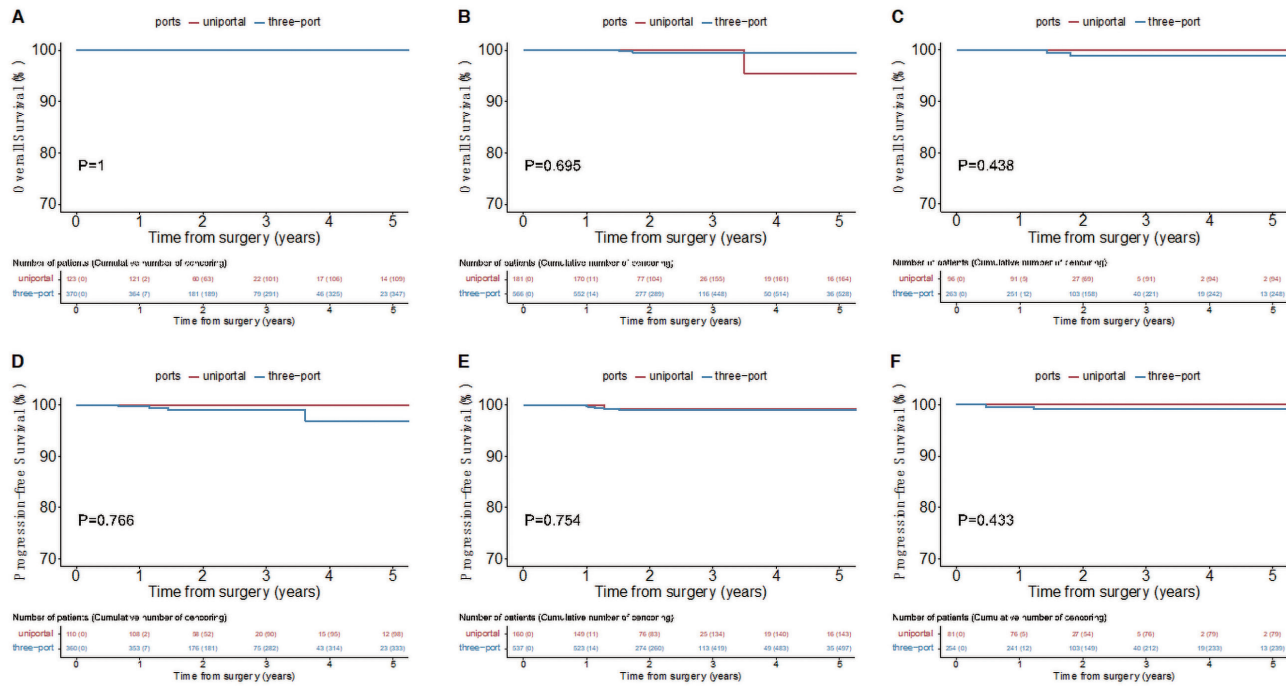

**Figure S4** Survival curves in subgroups of simple, complex, and combined segmentectomies. Red solid line represented uniportal thoracoscopic segmentectomy, blue solid line represented three-port segmentectomy. (A-C) Overall survival curves in subgroups of simple, complex, and combined segmentectomy. (D-F) Progression-free survival curves in subgroups of simple, complex, and combined segmentectomy. Confidence limit, 95%.
